# Supplementary material for: Urinary metabolomic signature of esophageal cancer and Barrett’s esophagus
Source: PubMed Central journal article supplement (PMC3579706; doi:10.1186/1477-7819-10-271), 2012-12-15
Supplement: 1477-7819-10-271-S1.pdf [file 1477-7819-10-271-S1.pdf]

| Metabolite              | <sup>1</sup> H chemical shift (ppm relative to DSS) and multiplicity <sup>a</sup> |
|-------------------------|-----------------------------------------------------------------------------------|
| 1-Methylnicotinamide    | 9.26(br s), 8.95(m), 8.88(m), 4.47(s)                                             |
| 1,6-Anhydro-β-D Glucose | 5.44(m), 4.98(dd)                                                                 |
| 2-Aminobutyrate         | 0.97(t)                                                                           |
| 2-Hydroxyisobutyrate    | 1.35(s)                                                                           |
| 2-Oxoglutarate          | 3.00(t), 3.00(t)                                                                  |
| 3-Hydroxyisovalerate    | 2.36(s), 1.26(s)                                                                  |
| 3-Indoxysulfate         | 7.69(m), 7.49(m), 7.26(m), 7.19(m)                                                |
| 4-Hydroxyphenylacetate  | 7.15(m), 6.85(m), 3.44(s)                                                         |
| 4-Pyridoxate            | 7.86(s), 2.44(s)                                                                  |
| Acetate                 | 1.91(s)                                                                           |
| Acetone                 | 2.22(s)                                                                           |
| Alanine                 | 1.47(d)                                                                           |
| Asparagine              | 2.95(dd), 2.85(dd)                                                                |
| Betaine                 | 3.25(br s)                                                                        |
| Carnitine               | 3.21(br s), 2.43(br s)                                                            |
| Choline                 | 3.19(br s)                                                                        |
| cis-Aconitate           | 3.12(d), 5.74(t)                                                                  |
| Citrate                 | 2.53(d), 2.68(d)                                                                  |
| Creatinine              | 3.03(br s), 4.05(br s)                                                            |
| Dimethylamine           | 2.72(s)                                                                           |
| Ethanolamine            | 3.14(m)                                                                           |
| Ethylmalonate           | 1.70(m), 0.87(t)                                                                  |
| Formate                 | 8.44(s)                                                                           |
| Fucose                  | 5.20(d), 4.55(d), 1.24(d)                                                         |
| Glucose                 | 5.23(d), 4.63(d), 3.23(m)                                                         |
| Glutamine               | 2.43(m), 2.46(m)                                                                  |
| Glycine                 | 3.55(s)                                                                           |
| Hippurate               | 7.82(m), 7.63(M), 7.54(m), 3.96(d)                                                |
| Histidine               | 7.85(br s), 7.08(br s)                                                            |
| Hypoxanthine            | 8.20(s), 8.18(s)                                                                  |
| Isoleucine              | 1.00(d), 0.93(t)                                                                  |
| Lactate                 | 1.32(d)                                                                           |
| Leucine                 | 0.95(d), 0.94(d)                                                                  |
| Lysine                  | 3.02(m), 1.71(m)                                                                  |
| N,N-Dimethylglycine     | 2.91(s)                                                                           |
| O-Acetylcarnitine       | 3.18(br s), 2.13(s)                                                               |
| Pantothenate            | 0.92(s), 0.88(s)                                                                  |
| π-Methylhistidine       | 8.07(br s), 7.12(br s), 3.73(s)                                                   |
| Pyroglutamate           | 2.39(m)                                                                           |
| Succinate               | 2.40(s)                                                                           |
| Sucrose                 | 5.40(d), 4.21(d)                                                                  |
| τ-methylhistidine       | 7.72(br s), 7.02(br s)                                                            |
| Taurine                 | 3.42(t), 3.25(t)                                                                  |
| Threonine               | 1.32(d)                                                                           |
| trans-Aconitate         | 6.58(t), 3.44(d)                                                                  |
| Trigonelline            | 9.11(br s), 8.82(m), 4.42(s)                                                      |
| Trimethylamine-N-oxide  | 3.25(s)                                                                           |
| Tryptophan              | 7.71(m)                                                                           |
| Tyrosine                | 7.18(m), 6.88(m)                                                                  |
| Urea                    | 5.77(br s)                                                                        |
| Valine                  | 1.03(d), 0.98(d)                                                                  |
| Xylose                  | 4.57(d)                                                                           |

<sup>a</sup> s (singlet), br s (broad singlet), d (doublet), dd (doublet of doublets), t (triplet)
