# Supplementary material for: Urinary metabolomic signature of esophageal cancer and Barrett’s esophagus
Source: PubMed Central journal article supplement (PMC3579706; doi:10.1186/1477-7819-10-271), 2012-12-15

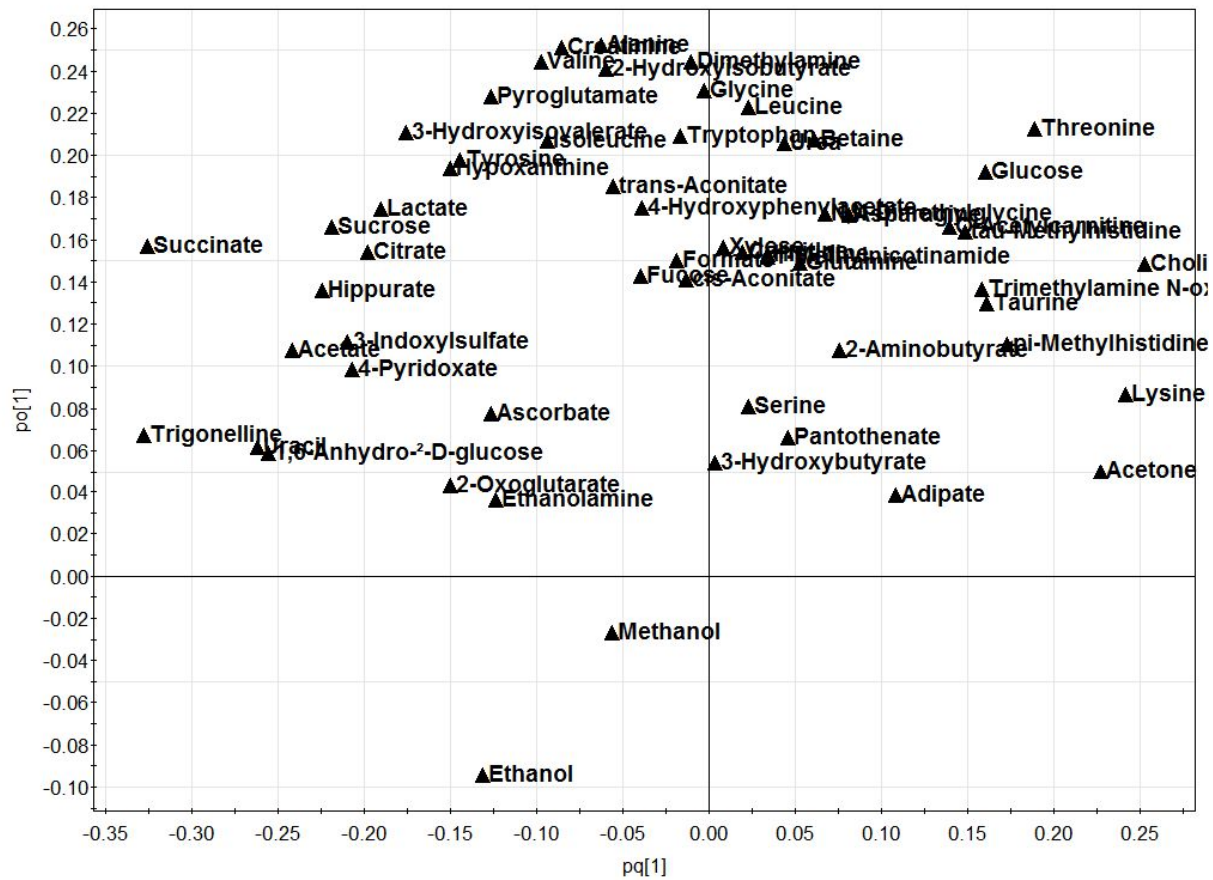

Supplement: 1477-7819-10-271-S5.pdf [file 1477-7819-10-271-S5.pdf]
