# Supplementary material for: Urinary metabolomic signature of esophageal cancer and Barrett’s esophagus
Source: World J Surg Oncol. 2012 Dec 15;10:271. doi: 10.1186/1477-7819-10-271 (PMC3579706; doi:10.1186/1477-7819-10-271)
Supplement: Additional file 6 — Exogenous Metabolites with Source Description. [file 1477-7819-10-271-S6.pdf]

| Exogenous Metabolites       | Class                             | Source Description                                                                                                                                    |
|-----------------------------|-----------------------------------|-------------------------------------------------------------------------------------------------------------------------------------------------------|
| <b>1,6 Anhydroglucose</b>   | <i>Carbohydrate</i>               | Monosaccharide product of cellulose combustion excreted in urine<br>Potential dietary source includes caramel                                         |
| <b>2-Hydroxyisobutyrate</b> | <i>Hydroxy acid</i>               | Organic acid metabolite of methyl tert-butyl ether, obtained from environmental exposure                                                              |
| <b>4-Pyridoxate</b>         | <i>Pyridoxals and derivatives</i> | Metabolic byproduct of vitamin B6 excreted in urine                                                                                                   |
| <b>Adipate</b>              | <i>Dicarboxylic acid</i>          | Dicarboxylic acid often used as a gelling agent in dietary products                                                                                   |
| <b>Ascorbate</b>            | <i>Hydroxy acid</i>               | Essential nutrient of dietary origin. Vitamin C biologically active form                                                                              |
| <b>Ethanol</b>              | <i>Simple alcohol</i>             | Alcohol present in biofluids from alcoholic consumption<br>Small quantities produced from microbial metabolism and cleared with first pass metabolism |
| <b>Sucrose</b>              | <i>Carbohydrate</i>               | Disaccharide sugar used as a sweetener and found naturally in certain food plants                                                                     |
| <b>Xylose</b>               | <i>Carbohydrate</i>               | Pentose sugar constituent of plant polysaccharides, present in legumes and some high fibre foods<br>Involved in carbohydrate metabolism               |
